# Supplementary material for: Prevalence of laceration injuries in professional and amateur rugby union: a systematic review and meta-analysis
Source: PubMed Central journal article supplement — BMJ Open Sport Exerc Med. 2017 Jul 20;3(1):e000239. doi: 10.1136/bmjsem-2017-000239 (PMC5530108; doi:10.1136/bmjsem-2017-000239), 2017-07-20
Supplement: bmjsem-2017-000239supp001.pdf [file bmjsem-2017-000239supp001.pdf]

## Risk of bias assessment

| Study                                        | Item 1: Study setting and study period | Item 2: Eligibility criteria and player selection | Item 3: Exposure definition and measurement | Item 4: Injury definition, measurement and reporting | Cumulative number of items with bias |
|----------------------------------------------|----------------------------------------|---------------------------------------------------|---------------------------------------------|------------------------------------------------------|--------------------------------------|
| Best <i>et al</i> , 2005 <sup>20</sup>       | 0                                      | 0                                                 | 0                                           | 0                                                    | <b>0</b>                             |
| Bird <i>et al</i> , 1998 <sup>21</sup>       | 0                                      | 0                                                 | 1                                           | 1                                                    | <b>2</b>                             |
| Brooks <i>et al</i> , 2005 <sup>3</sup>      | 0                                      | 0                                                 | 0                                           | 0                                                    | <b>0</b>                             |
| Brooks <i>et al</i> , 2005 <sup>22</sup>     | 0                                      | 0                                                 | 0                                           | 0                                                    | <b>0</b>                             |
| Brooks <i>et al</i> , 2005 <sup>23</sup>     | 0                                      | 0                                                 | 0                                           | 0                                                    | <b>0</b>                             |
| Fuller <i>et al</i> , 2008 <sup>24</sup>     | 0                                      | 0                                                 | 0                                           | 0                                                    | <b>0</b>                             |
| Fuller <i>et al</i> , 2009 <sup>25</sup>     | 0                                      | 0                                                 | 0                                           | 1                                                    | <b>1</b>                             |
| Fuller & Molloy, 2011 <sup>26</sup>          | 0                                      | 0                                                 | 0                                           | 1                                                    | <b>1</b>                             |
| Fuller <i>et al</i> , 2013 <sup>27</sup>     | 0                                      | 0                                                 | 0                                           | 0                                                    | <b>0</b>                             |
| Jakoet & Noakes 1998 <sup>28</sup>           | 0                                      | 0                                                 | 0                                           | 1                                                    | <b>1</b>                             |
| Kerr (2008) <sup>29</sup>                    | 0                                      | 1                                                 | 1                                           | 0                                                    | <b>2</b>                             |
| Schwellnus <i>et al</i> , 2014 <sup>30</sup> | 0                                      | 0                                                 | 0                                           | 0                                                    | <b>0</b>                             |

The four items were adapted from Walden *et al.*,<sup>17</sup> originally based on the “Strengthening the reporting of observational studies in epidemiology” (STROBE) statement<sup>18</sup>. Studies were assessed on each item for low risk (0) or high risk (1) of bias. High risk of bias could be caused by, but is not limited to, item 1: unclear reporting on the amateur or elite level of players, unclear reporting of number of seasons; item 2: large dropout (>25%) during study, unclear or biased selection of teams; item 3: approximate or unclear registration and calculation of exposure hours; item 4: unclear (skin) injury definition, retrospective reporting of injuries (e.g. telephone interviews). Studies with a cumulative score of 0 were defined as low risk of bias, studies with a score of 1-2 were defined as a medium risk of bias and studies with a score >3 were defined as high risk of bias.
